# Supplementary material for: UK Women’s Views of the Concepts of Personalised Breast Cancer Risk Assessment and Risk-Stratified Breast Screening: A Qualitative Interview Study
Source: MDPI journal article supplement (doi:10.3390/cancers13225813), 2021-11-19
Supplement: s1 [file s1]

**Supplementary Material S3:** Tabulated outline of the stages Framework Analysis for synthesising interview data to define main themes.

| <i>Organisational themes</i>         | <i>Codes</i>                                                      | <i>Main themes</i>                                                                                 | <i>Sub themes</i>                                                                                                                                  |
|--------------------------------------|-------------------------------------------------------------------|----------------------------------------------------------------------------------------------------|----------------------------------------------------------------------------------------------------------------------------------------------------|
| <b>Experience</b>                    | Health & lifestyle behaviours                                     |                 |                                                                                                                                                    |
|                                      | Personal health status                                            |                                                                                                    |                                                                                                                                                    |
|                                      | BC attitudes & experience                                         |                                                                                                    |                                                                                                                                                    |
| <b>Knowledge &amp; understanding</b> | BC knowledge, perceived severity/consequences                     |                                                                                                    |                                                                                                                                                    |
|                                      | Perceived risk, control and knowledge of RFs                      | <input type="checkbox"/> <b>Risk perceptions and acceptability of personalised risk assessment</b> | <ul style="list-style-type: none"> <li>• Perceived risk</li> <li>• Understanding of PRA</li> <li>• Willingness to receive risk feedback</li> </ul> |
|                                      | Understanding/misconceptions - PRA                                |                                                                                                    |                                                                                                                                                    |
|                                      | Understanding of rationale for RSBS                               |                                                                                                    |                                                                                                                                                    |
| <b>Intentions</b>                    | Providing data for PRA (classic; PRS & MD)                        |                                                                                                    |                                                                                                                                                    |
|                                      | Willingness to receive PR feedback                                | <input type="checkbox"/> <b>Ways of responding</b>                                                 | A typology: <ul style="list-style-type: none"> <li>• Overall acceptors</li> <li>• More is better</li> <li>• Screening sceptics</li> </ul>          |
|                                      | Attitudes towards extended age-range (HR)                         |                                                                                                    |                                                                                                                                                    |
|                                      | Attitudes towards increased frequency (HR: 3 & 4 risk-groups)     |                                                                                                    |                                                                                                                                                    |
|                                      | Attitudes towards MR (4 risk-groups)                              |                                                                                                    |                                                                                                                                                    |
|                                      | Attitudes towards AR (3 & 4 risk-groups)                          |                                                                                                    |                                                                                                                                                    |
|                                      | Attitudes towards shorter age-range (LR)                          |                                                                                                    |                                                                                                                                                    |
|                                      | Attitudes towards less frequent screening (LR: 3 & 4 risk-groups) |                                                                                                    |                                                                                                                                                    |
|                                      | Responses to No screening (v.LR + 4 risk-groups)                  | <input type="checkbox"/> <b>Influence of ladder of risk</b>                                        |                                                                                                                                                    |
| <b>Manageability</b>                 | Influence of lifestyle and chemoprevention on RSBS scenarios      |                                                                                                    |                                                                                                                                                    |
|                                      | Influence of ladder of risk                                       |                                                                                                    |                                                                                                                                                    |
|                                      | Need for information & support                                    | <input type="checkbox"/> <b>Concerns and conditions of acceptability</b>                           | <ul style="list-style-type: none"> <li>• Information support</li> <li>• Breast awareness support</li> <li>• Integration of PRA and RSBS</li> </ul> |
|                                      | Responses to screening harms & impact on RSBS scenarios           |                                                                                                    |                                                                                                                                                    |
| <b>Choice &amp; Responsibility</b>   | Personal vs. shared health responsibility for risk-management     |                                                                                                    |                                                                                                                                                    |
|                                      | Attitudes towards lifestyle change                                |                                                                                                    |                                                                                                                                                    |
| <b>Trust &amp; Confidence</b>        | Communication with HPs and help-seeking                           |                                                                                                    |                                                                                                                                                    |
|                                      | Attitudes towards medical research/innovation & health technology |                                                                                                    |                                                                                                                                                    |
|                                      | Trust in accuracy of risk prediction models                       |                                                                                                    |                                                                                                                                                    |
|                                      | Ethical & society implications of PRA & RSBS                      | <input type="checkbox"/> <b>Perceived effectiveness: RSBS vs. current NHSBS</b>                    |                                                                                                                                                    |
|                                      | NHS resources and trust in health providers                       |                                                                                                    |                                                                                                                                                    |
| <b>Overall impressions</b>           | BPS versus RSBS                                                   |                                                                                                    |                                                                                                                                                    |
|                                      | Screening modalities                                              |                                                                                                    |                                                                                                                                                    |
|                                      | Misunderstandings                                                 |                                                                                                    |                                                                                                                                                    |
|                                      | Organisational issues & concerns                                  |                                                                                                    |                                                                                                                                                    |

*Abbreviations:* average risk (AR); breast cancer (BC); breast screening programme (BSP); health professional's (HPs); high-risk (HR); low-risk (LR); ,moderate risk (MR); personal risk assessment (PRA); risk-factors (RFs) and risk-stratified breast screening (RSBS).
